# Supplementary material
Source: Springer Nature journal article supplement (https://www.springermedizin.de/resource/supplementary/12936_2004_77_MOESM1_ESM.pdf/9546810)

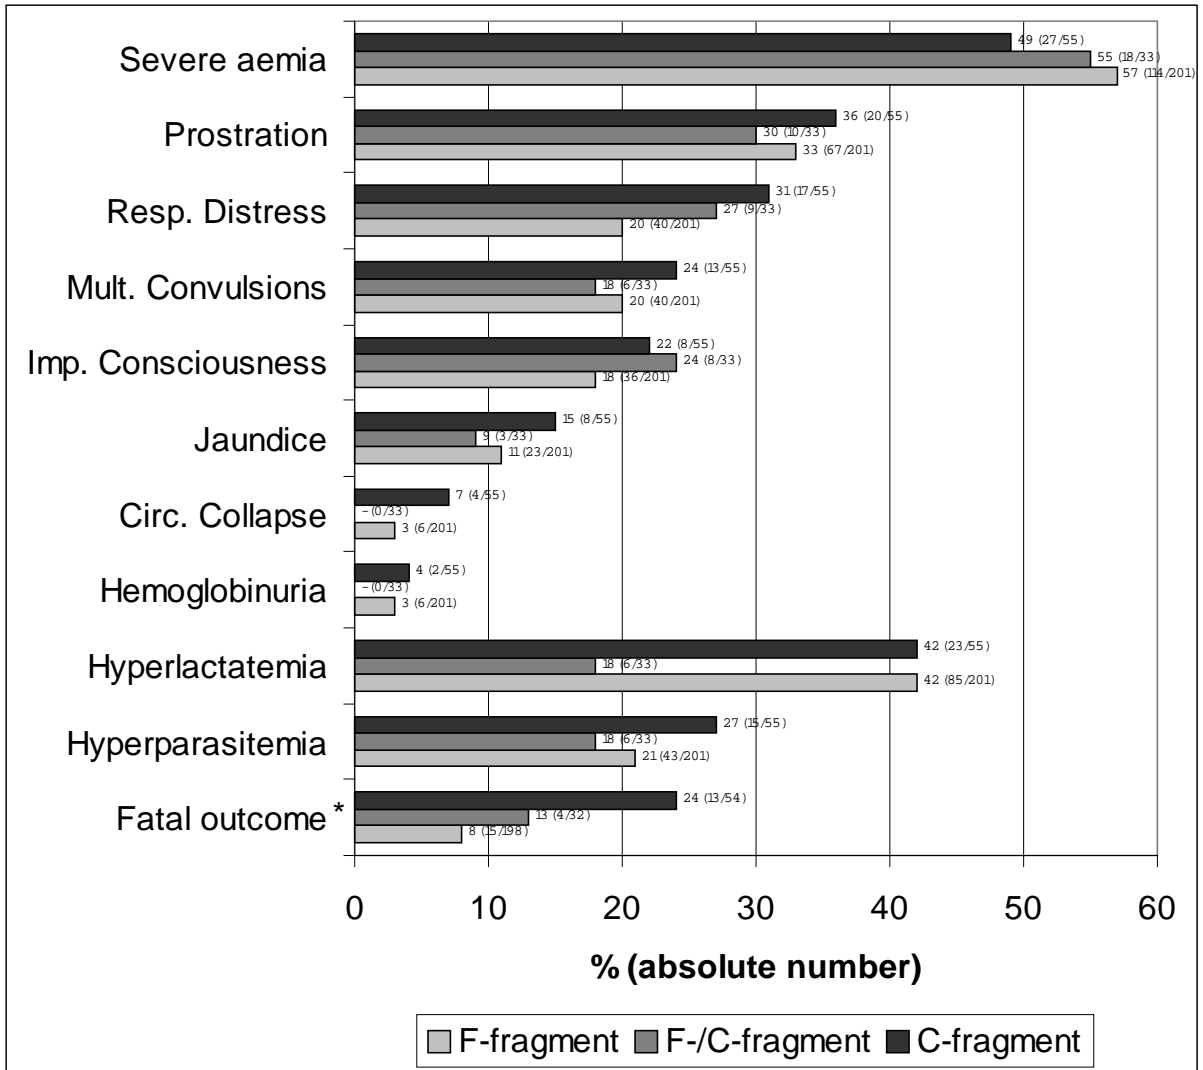

\*  $\chi^2_{\text{trend}} = 11.3$ ;  $P\text{-value} = .0008$

Supplement: MOESM1 [file 9546810]
